# Supplementary material for: Global Metabolomics of the Placenta Reveals Distinct Metabolic Profiles between Maternal and Fetal Placental Tissues Following Delivery in Non-Labored Women
Source: PubMed Central journal article supplement (PMC5876000; doi:10.3390/metabo8010010), 2018-01-23
Supplement: metabolites-08-00010-s001.pdf [file metabolites-08-00010-s001.pdf]

# 1 Global Metabolomics of the Placenta Reveals Distinct 2 Metabolic Profiles Between Maternal and Fetal Placental 3 Tissue Following Delivery in Non-Labored Women

4 Jacquelyn Walejko, BS<sup>1</sup>; Anushka Chelliah, MD<sup>2</sup>; Maureen Keller-Wood, PhD<sup>3</sup>; Anthony Gregg, MD,  
5 MBA<sup>4</sup>; Arthur S. Edison, PhD<sup>5</sup>

6 <sup>1</sup>Department of Biochemistry & Molecular Biology, University of Florida, Gainesville, FL, US; jwalejko@ufl.edu

7 <sup>2</sup>Department of Obstetrics, Gynecology, and Reproductive Sciences, University of Texas Health Science Center at  
8 Houston, UT Health, Houston, TX, 77030 US; anushka.chelliah@uth.tmc.edu

9 <sup>3</sup>Department of Pharmacodynamics, University of Florida, Gainesville, FL, 32610 US; kellerwd@cop.ufl.edu

10 <sup>4</sup>Department of Obstetrics and Gynecology, University of Florida, Gainesville, FL, 32610 US; greggar@ufl.edu

11 <sup>5</sup>Departments of Genetics and Biochemistry & Molecular Biology, Complex Carbohydrate Research Center,  
12 University of Georgia, Athens, GA, 30602 US; aedison@uga.edu

13 \* Correspondence: aedison@uga.edu; Tel.: +1-706-542-8156

## 14 Supplementary Material

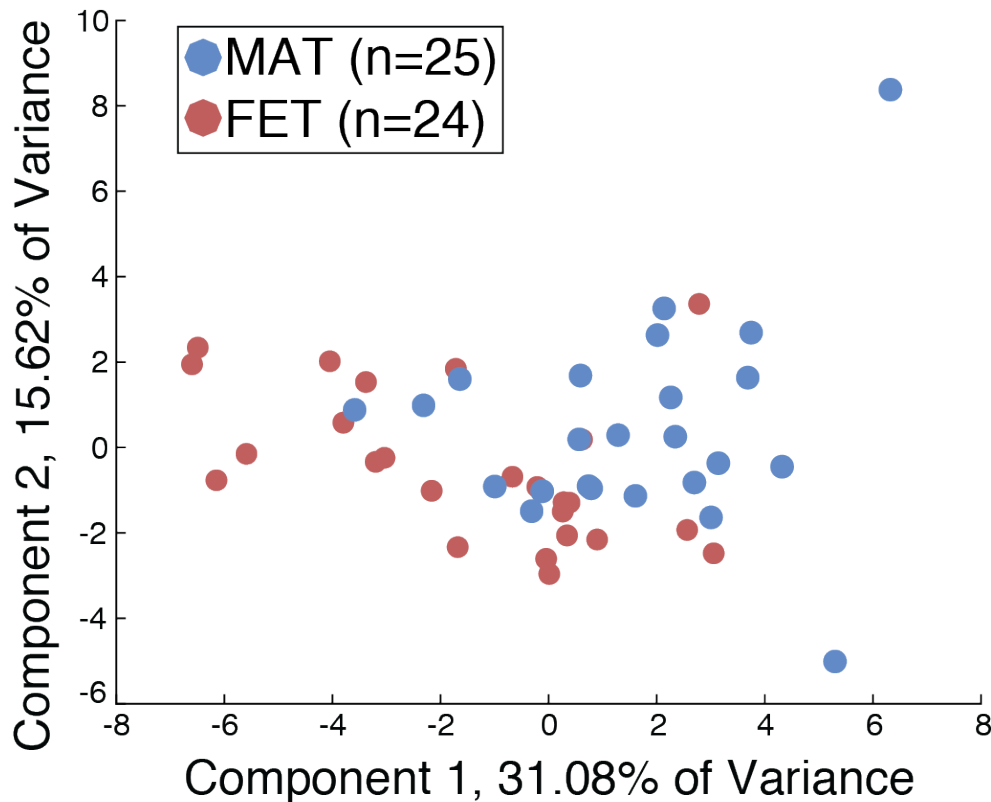

15

16 **Figure S1:** PCA scores plot of maternal and fetal spectra from 13 placentas at 15 min postdelivery. Maternal  
17 (MAT, n=25) samples are displayed in blue while fetal (FET, n=24) are displayed in red.

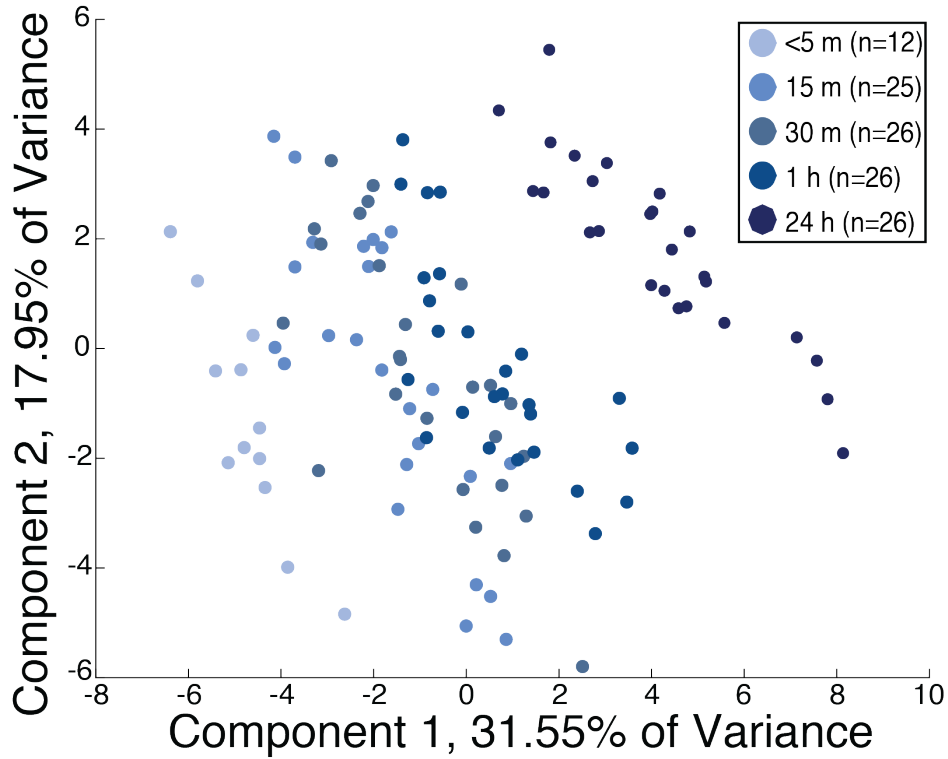

18  
19  
20  
21

**Figure S2** PCA scores plot of specimens from the maternal surface of 13 placentas at 5 time points postdelivery: 1) <5 min (n=12), 2) 15 min (n=25), 3) 30 min (n=26), 4) 1 h (n=26), and 5) 24 h (n=26). Time points are represented as varying shades of blue from light (<5 min) to dark (24 h).

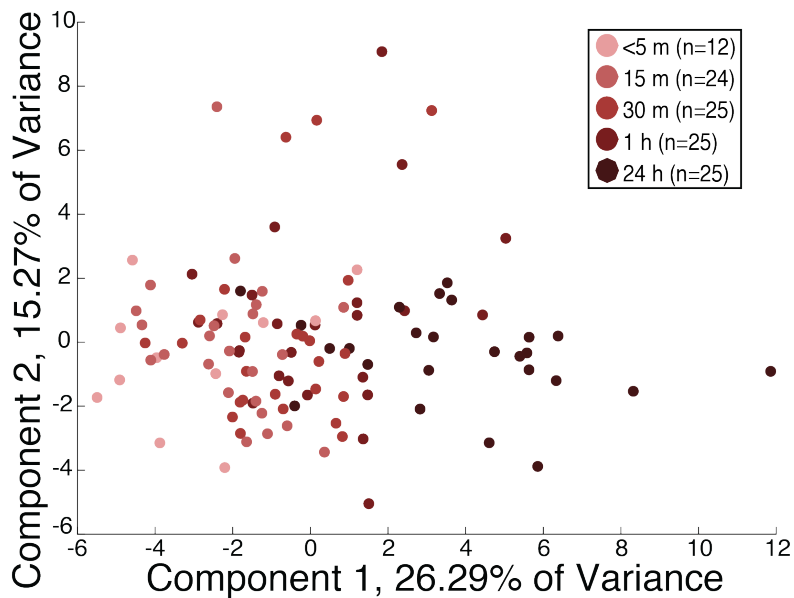

22  
23  
24  
25

**Figure S3:** PCA scores plot of specimens from the fetal surface of the placenta from 13 placentas at 5 time points postdelivery: 1) <5 min (n=12), 2) 15 min (n=24), 3) 30 min (n=25), 4) 1 h (n=25), and 5) 24 h (n=25). Time points are represented as varying shades of red from light (<5 min) to dark (24 h).

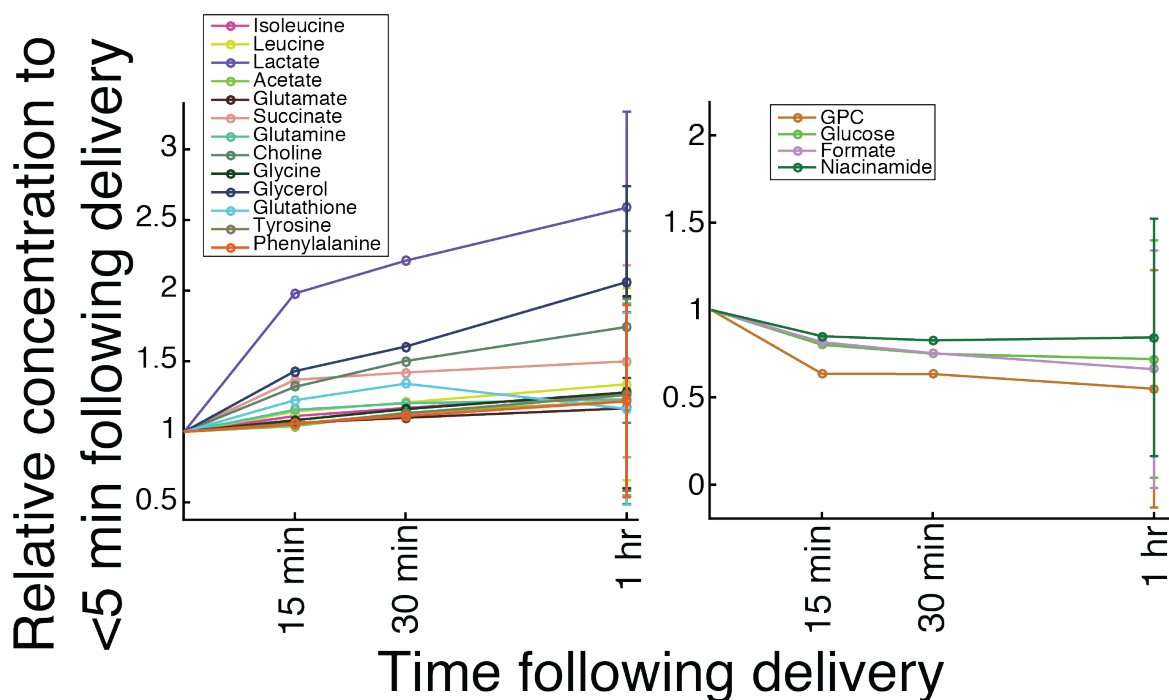

26  
 27 **Figure S4. (A)** Relative concentration of metabolites on the maternal surface of the placenta that are  
 28 significantly increased (FDR-corrected  $p < 0.05$ ) prior to 1 h following delivery. **(B)** Glucose, GPC,  
 29 and niacinamide decrease linearly prior to 1 h following delivery, with one or more time points significantly  
 30 decreased (FDR-corrected  $p < 0.05$ ) over prior to 1 h following delivery. Concentrations are normalized to the  
 31 concentration <5 min following delivery for each metabolite. Standard errors are shown on the 1 h data-  
 32 point for each metabolite. Full post-hoc analysis is shown in Table S2.

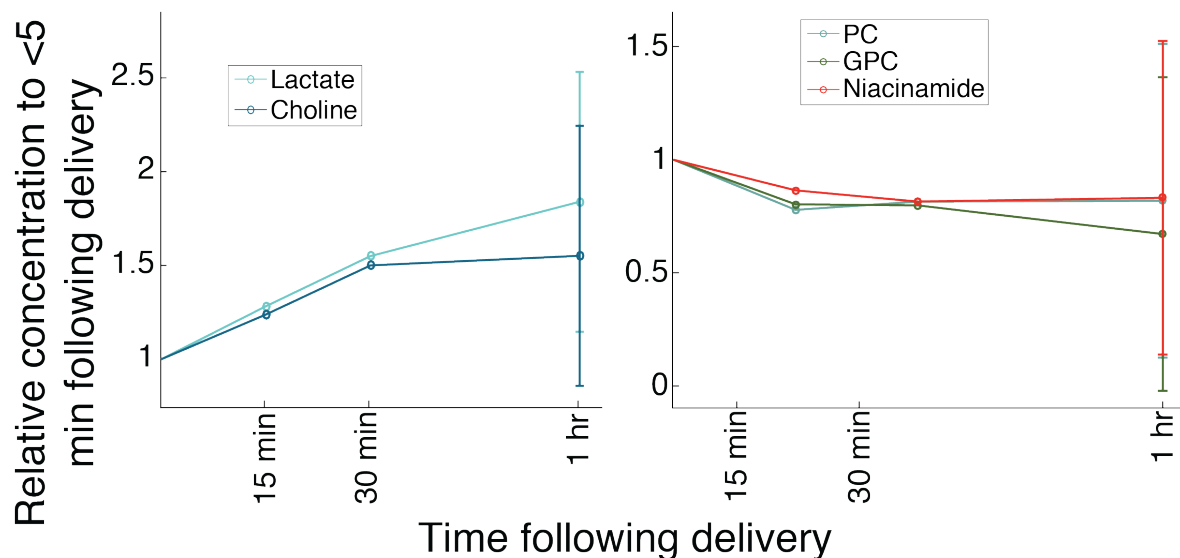

33  
 34 **Figure S5. (A)** Unlike the maternal surfaces of the placenta, lactate and choline are only metabolites  
 35 significantly increased (FDR-corrected  $p < 0.05$ ) prior to 1 h following delivery on the fetal surface of the  
 36 placenta. **(B)** PC, GPC, and niacinamide decrease linearly prior to 1 h following delivery, with one or more  
 37 time points significantly decreased (FDR-corrected  $p < 0.05$ ) over prior to 1 h following delivery.

38 Concentrations are normalized to the concentration <5 min following delivery for each metabolite. Standard  
 39 errors are shown on the 1 h data-point for each metabolite. Full post-hoc analysis is shown in Table S3.

40 **Table S1.** Placental Metabolites and Confidence Levels

| Metabolite        | Chemical shift range (ppm) |      | Confidence level <sup>a</sup> |
|-------------------|----------------------------|------|-------------------------------|
|                   |                            |      |                               |
| VLDL <sup>b</sup> | 0.80                       | 0.90 | 2                             |
| Isoleucine        | 0.99                       | 1.02 | 3                             |
| Leucine           | 0.94                       | 0.97 | 4                             |
| Valine            | 1.02                       | 1.05 | 4                             |
| 3-HB <sup>c</sup> | 1.18                       | 1.20 | 2                             |
| Lactate           | 1.30                       | 1.34 | 4                             |
| Alanine           | 1.46                       | 1.49 | 4                             |
| Acetate           | 1.91                       | 1.92 | 3                             |
| Acetone           | 2.22                       | 2.23 | 2                             |
| Glutamate         | 2.32                       | 2.37 | 4                             |
| Succinate         | 2.40                       | 2.41 | 3                             |
| Glutamine         | 2.43                       | 2.47 | 4                             |
| Citrate           | 2.53                       | 2.57 | 2                             |
| Aspartate         | 2.81                       | 2.83 | 4                             |
| Asparagine        | 2.83                       | 2.88 | 4                             |
| Lysine            | 3.00                       | 3.02 | 4                             |
| Creatine          | 3.02                       | 3.04 | 4                             |
| Choline           | 3.19                       | 3.20 | 4                             |
| PC <sup>c</sup>   | 3.21                       | 3.22 | 4                             |
| GPC <sup>e</sup>  | 3.22                       | 3.23 | 4                             |
| Taurine           | 3.40                       | 3.44 | 4                             |
| Glucose           | 3.44                       | 3.48 | 4                             |
| Myo-inositol      | 3.59                       | 3.62 | 4                             |
| Glycine           | 3.55                       | 3.55 | 3                             |
| Glycerol          | 3.56                       | 3.57 | 4                             |
| Serine            | 3.83                       | 3.85 | 4                             |
| Threonine         | 4.23                       | 4.26 | 4                             |
| Glutathione       | 4.55                       | 4.58 | 2                             |
| Uracil            | 5.79                       | 5.81 | 4                             |
| Uridine           | 5.88                       | 5.92 | 2                             |
| Fumarate          | 6.51                       | 6.51 | 2                             |
| Tyrosine          | 6.88                       | 6.91 | 4                             |
| Phenylalanine     | 7.30                       | 7.44 | 4                             |

|              |      |      |   |
|--------------|------|------|---|
| Histidine    | 8.15 | 8.17 | 3 |
| Hypoxanthine | 8.18 | 8.21 | 3 |
| Inosine      | 8.22 | 8.23 | 2 |
| Formate      | 8.44 | 8.45 | 2 |
| Niacinamide  | 8.70 | 8.71 | 3 |

<sup>a</sup>Confidence scale is defined as follows: 1) putatively characterized compound classes or annotated compounds, 2) matched to literature and/or 1D SBASE compound (AssureNMR), 3) matched to HSQC (AssureNMR), 4) matched to HSQC and validated by HSQC-TOCSY (COLMARm), and 5) validated by spiking the authentic compound into sample

<sup>b</sup>VLDL: Very low-density lipoprotein

<sup>c</sup>3-HB: 3-hydroxybutyrate

<sup>d</sup>PC: Phosphocholine

<sup>e</sup>GPC: Glycerophosphocholine

41

**Table S2.** Tukey-Kramer Post-Hoc Results for Maternal Surface of Placenta

| VLDL       |         |          |          |          |         |
|------------|---------|----------|----------|----------|---------|
| Group 1    | Group 2 | Lower CI | Estimate | Upper CI | p-value |
| <5m        | 15m     | -0.37    | -0.04    | 0.29     | 1.00    |
| <5m        | 30m     | -0.28    | 0.04     | 0.37     | 1.00    |
| <5m        | 1h      | -0.26    | 0.07     | 0.39     | 0.98    |
| <5m        | 24h     | -0.06    | 0.26     | 0.58     | 0.18    |
| 15m        | 30m     | -0.18    | 0.08     | 0.34     | 0.90    |
| 15m        | 1h      | -0.15    | 0.11     | 0.37     | 0.78    |
| 15m        | 24h     | 0.04     | 0.30     | 0.56     | 0.02    |
| 30m        | 1h      | -0.23    | 0.02     | 0.28     | 1.00    |
| 30m        | 24h     | -0.04    | 0.22     | 0.47     | 0.14    |
| 1h         | 24h     | -0.07    | 0.19     | 0.45     | 0.24    |
| Isoleucine |         |          |          |          |         |
| <5m        | 15m     | -0.07    | -0.02    | 0.02     | 0.61    |
| <5m        | 30m     | -0.08    | -0.04    | 0.01     | 0.19    |
| <5m        | 1h      | -0.10    | -0.06    | -0.01    | 0.01    |
| <5m        | 24h     | -0.13    | -0.08    | -0.04    | 9.9E-06 |
| 15m        | 30m     | -0.05    | -0.01    | 0.02     | 0.89    |
| 15m        | 1h      | -0.07    | -0.03    | 2.6E-03  | 0.08    |
| 15m        | 24h     | -0.10    | -0.06    | -0.02    | 8.7E-05 |
| 30m        | 1h      | -0.06    | -0.02    | 0.01     | 0.46    |
| 30m        | 24h     | -0.08    | -0.05    | -0.01    | 2.4E-03 |
| 1h         | 24h     | -0.06    | -0.03    | 0.01     | 0.23    |

| Leucine |     |       |         |         |         |
|---------|-----|-------|---------|---------|---------|
| <5m     | 15m | -0.37 | -0.13   | 0.10    | 0.53    |
| <5m     | 30m | -0.43 | -0.19   | 0.04    | 0.16    |
| <5m     | 1h  | -0.55 | -0.31   | -0.08   | 3.2E-03 |
| <5m     | 24h | -0.66 | -0.42   | -0.19   | 2.3E-05 |
| 15m     | 30m | -0.25 | -0.06   | 0.13    | 0.90    |
| 15m     | 1h  | -0.37 | -0.18   | 0.01    | 0.07    |
| 15m     | 24h | -0.48 | -0.29   | -0.10   | 4.1E-04 |
| 30m     | 1h  | -0.31 | -0.12   | 0.07    | 0.39    |
| 30m     | 24h | -0.42 | -0.23   | -0.04   | 0.01    |
| 1h      | 24h | -0.30 | -0.11   | 0.08    | 0.48    |
| Valine  |     |       |         |         |         |
| <5m     | 15m | -0.13 | -0.03   | 0.08    | 0.96    |
| <5m     | 30m | -0.16 | -0.06   | 0.05    | 0.56    |
| <5m     | 1h  | -0.21 | -0.10   | 3.2E-03 | 0.06    |
| <5m     | 24h | -0.27 | -0.16   | -0.06   | 4.0E-04 |
| 15m     | 30m | -0.12 | -0.03   | 0.05    | 0.83    |
| 15m     | 1h  | -0.16 | -0.08   | 0.01    | 0.09    |
| 15m     | 24h | -0.22 | -0.14   | -0.05   | 1.7E-04 |
| 30m     | 1h  | -0.13 | -0.04   | 0.04    | 0.58    |
| 30m     | 24h | -0.19 | -0.11   | -0.02   | 0.01    |
| 1h      | 24h | -0.14 | -0.06   | 0.02    | 0.28    |
| 3-HB    |     |       |         |         |         |
| <5m     | 15m | -0.17 | -0.02   | 0.12    | 0.99    |
| <5m     | 30m | -0.16 | -0.02   | 0.12    | 0.99    |
| <5m     | 1h  | -0.15 | -0.01   | 0.13    | 1.00    |
| <5m     | 24h | -0.16 | -0.02   | 0.12    | 0.99    |
| 15m     | 30m | -0.11 | 1.1E-03 | 0.11    | 1.00    |
| 15m     | 1h  | -0.10 | 0.01    | 0.13    | 1.00    |
| 15m     | 24h | -0.11 | 3.0E-03 | 0.12    | 1.00    |
| 30m     | 1h  | -0.10 | 0.01    | 0.13    | 1.00    |
| 30m     | 24h | -0.11 | 1.8E-03 | 0.11    | 1.00    |
| 1h      | 24h | -0.12 | -0.01   | 0.10    | 1.00    |
| Lactate |     |       |         |         |         |
| <5m     | 15m | -7.79 | -5.26   | -2.73   | 7.5E-07 |
| <5m     | 30m | -9.02 | -6.51   | -3.99   | 1.1E-08 |

|         |     |        |          |         |         |
|---------|-----|--------|----------|---------|---------|
| <5m     | 1h  | -11.04 | -8.53    | -6.01   | 9.9E-09 |
| <5m     | 24h | -16.50 | -13.98   | -11.47  | 9.9E-09 |
| 15m     | 30m | -3.26  | -1.24    | 0.77    | 0.43    |
| 15m     | 1h  | -5.28  | -3.26    | -1.25   | 1.7E-04 |
| 15m     | 24h | -10.74 | -8.72    | -6.70   | 9.9E-09 |
| 30m     | 1h  | -4.02  | -2.02    | -0.02   | 0.05    |
| 30m     | 24h | -9.48  | -7.48    | -5.48   | 9.9E-09 |
| 1h      | 24h | -7.46  | -5.46    | -3.46   | 1.0E-08 |
|         |     |        |          |         |         |
| Alanine |     |        |          |         |         |
| <5m     | 15m | -0.39  | -0.12    | 0.15    | 0.74    |
| <5m     | 30m | -0.45  | -0.18    | 0.09    | 0.37    |
| <5m     | 1h  | -0.55  | -0.27    | 2.9E-04 | 0.05    |
| <5m     | 24h | -0.67  | -0.40    | -0.13   | 8.3E-04 |
| 15m     | 30m | -0.28  | -0.06    | 0.16    | 0.95    |
| 15m     | 1h  | -0.37  | -0.15    | 0.07    | 0.31    |
| 15m     | 24h | -0.50  | -0.28    | -0.06   | 0.01    |
| 30m     | 1h  | -0.31  | -0.09    | 0.12    | 0.75    |
| 30m     | 24h | -0.44  | -0.22    | -0.01   | 0.04    |
| 1h      | 24h | -0.34  | -0.13    | 0.09    | 0.48    |
|         |     |        |          |         |         |
| Acetate |     |        |          |         |         |
| <5m     | 15m | -0.08  | -0.01    | 0.05    | 0.98    |
| <5m     | 30m | -0.11  | -0.04    | 0.02    | 0.31    |
| <5m     | 1h  | -0.13  | -0.07    | -0.01   | 0.02    |
| <5m     | 24h | -0.16  | -0.10    | -0.04   | 1.7E-04 |
| 15m     | 30m | -0.08  | -0.03    | 0.02    | 0.45    |
| 15m     | 1h  | -0.11  | -0.06    | -0.01   | 0.02    |
| 15m     | 24h | -0.14  | -0.09    | -0.04   | 3.8E-05 |
| 30m     | 1h  | -0.08  | -0.03    | 0.02    | 0.58    |
| 30m     | 24h | -0.11  | -0.06    | -0.01   | 0.01    |
| 1h      | 24h | -0.08  | -0.03    | 0.02    | 0.42    |
|         |     |        |          |         |         |
| Acetone |     |        |          |         |         |
| <5m     | 15m | -0.02  | 5.4E-04  | 0.02    | 1.00    |
| <5m     | 30m | -0.02  | -1.8E-03 | 0.02    | 1.00    |
| <5m     | 1h  | -0.02  | 0.01     | 0.03    | 0.91    |
| <5m     | 24h | -0.01  | 0.02     | 0.04    | 0.32    |
| 15m     | 30m | -0.02  | -2.4E-03 | 0.02    | 1.00    |

|           |     |          |         |          |         |
|-----------|-----|----------|---------|----------|---------|
| 15m       | 1h  | -0.01    | 0.01    | 0.03     | 0.86    |
| 15m       | 24h | -3.2E-03 | 0.02    | 0.03     | 0.15    |
| 30m       | 1h  | -0.01    | 0.01    | 0.03     | 0.66    |
| 30m       | 24h | -6.6E-04 | 0.02    | 0.04     | 0.06    |
| 1h        | 24h | -0.01    | 0.01    | 0.03     | 0.68    |
|           |     |          |         |          |         |
| Glutamate |     |          |         |          |         |
| <5m       | 15m | -0.42    | -0.11   | 0.19     | 0.83    |
| <5m       | 30m | -0.48    | -0.18   | 0.12     | 0.45    |
| <5m       | 1h  | -0.60    | -0.30   | -3.8E-03 | 0.05    |
| <5m       | 24h | -0.56    | -0.26   | 0.04     | 0.12    |
| 15m       | 30m | -0.31    | -0.07   | 0.17     | 0.94    |
| 15m       | 1h  | -0.43    | -0.19   | 0.05     | 0.19    |
| 15m       | 24h | -0.39    | -0.15   | 0.09     | 0.44    |
| 30m       | 1h  | -0.36    | -0.12   | 0.12     | 0.62    |
| 30m       | 24h | -0.32    | -0.08   | 0.16     | 0.89    |
| 1h        | 24h | -0.20    | 0.04    | 0.28     | 0.99    |
|           |     |          |         |          |         |
| Succinate |     |          |         |          |         |
| <5m       | 15m | -0.13    | -0.06   | 0.01     | 0.11    |
| <5m       | 30m | -0.14    | -0.07   | -6.1E-04 | 0.05    |
| <5m       | 1h  | -0.15    | -0.08   | -0.01    | 0.01    |
| <5m       | 24h | -0.15    | -0.08   | -0.01    | 0.02    |
| 15m       | 30m | -0.07    | -0.01   | 0.05     | 0.99    |
| 15m       | 1h  | -0.08    | -0.02   | 0.03     | 0.81    |
| 15m       | 24h | -0.07    | -0.02   | 0.04     | 0.91    |
| 30m       | 1h  | -0.07    | -0.01   | 0.04     | 0.96    |
| 30m       | 24h | -0.06    | -0.01   | 0.05     | 0.99    |
| 1h        | 24h | -0.05    | 4.3E-03 | 0.06     | 1.00    |
|           |     |          |         |          |         |
| Glutamine |     |          |         |          |         |
| <5m       | 15m | -0.19    | -0.10   | 2.7E-03  | 0.06    |
| <5m       | 30m | -0.22    | -0.12   | -0.03    | 0.01    |
| <5m       | 1h  | -0.24    | -0.14   | -0.04    | 1.0E-03 |
| <5m       | 24h | -0.19    | -0.09   | 0.01     | 0.08    |
| 15m       | 30m | -0.11    | -0.03   | 0.05     | 0.85    |
| 15m       | 1h  | -0.12    | -0.05   | 0.03     | 0.49    |
| 15m       | 24h | -0.07    | 3.7E-03 | 0.08     | 1.00    |
| 30m       | 1h  | -0.09    | -0.02   | 0.06     | 0.97    |



|            |     |       |          |         |         |
|------------|-----|-------|----------|---------|---------|
| 30m        | 24h | -0.05 | 0.03     | 0.11    | 0.78    |
| 1h         | 24h | -0.03 | 0.05     | 0.13    | 0.40    |
|            |     |       |          |         |         |
| Citrate    |     |       |          |         |         |
| <5m        | 15m | -0.15 | -0.05    | 0.04    | 0.50    |
| <5m        | 30m | -0.16 | -0.07    | 0.03    | 0.29    |
| <5m        | 1h  | -0.12 | -0.03    | 0.06    | 0.91    |
| <5m        | 24h | -0.03 | 0.06     | 0.15    | 0.37    |
| 15m        | 30m | -0.09 | -0.01    | 0.06    | 0.99    |
| 15m        | 1h  | -0.05 | 0.02     | 0.10    | 0.89    |
| 15m        | 24h | 0.04  | 0.11     | 0.19    | 4.0E-04 |
| 30m        | 1h  | -0.04 | 0.04     | 0.11    | 0.64    |
| 30m        | 24h | 0.05  | 0.13     | 0.20    | 5.7E-05 |
| 1h         | 24h | 0.02  | 0.09     | 0.16    | 0.01    |
|            |     |       |          |         |         |
| Aspartate  |     |       |          |         |         |
| <5m        | 15m | -0.04 | -0.01    | 0.01    | 0.56    |
| <5m        | 30m | -0.04 | -0.02    | 0.01    | 0.39    |
| <5m        | 1h  | -0.05 | -0.02    | 4.1E-03 | 0.14    |
| <5m        | 24h | -0.05 | -0.03    | 1.3E-03 | 0.07    |
| 15m        | 30m | -0.02 | 0.00     | 0.02    | 1.00    |
| 15m        | 1h  | -0.03 | -0.01    | 0.01    | 0.83    |
| 15m        | 24h | -0.03 | -0.01    | 0.01    | 0.63    |
| 30m        | 1h  | -0.03 | -0.01    | 0.02    | 0.95    |
| 30m        | 24h | -0.03 | -0.01    | 0.01    | 0.82    |
| 1h         | 24h | -0.02 | -2.7E-03 | 0.02    | 1.00    |
|            |     |       |          |         |         |
| Asparagine |     |       |          |         |         |
| <5m        | 15m | -0.02 | 0.01     | 0.03    | 0.94    |
| <5m        | 30m | -0.03 | 1.6E-04  | 0.03    | 1.00    |
| <5m        | 1h  | -0.03 | -0.01    | 0.02    | 0.96    |
| <5m        | 24h | -0.03 | -4.5E-03 | 0.02    | 0.99    |
| 15m        | 30m | -0.03 | -0.01    | 0.01    | 0.88    |
| 15m        | 1h  | -0.04 | -0.01    | 0.01    | 0.36    |
| 15m        | 24h | -0.03 | -0.01    | 0.01    | 0.53    |
| 30m        | 1h  | -0.03 | -0.01    | 0.01    | 0.90    |
| 30m        | 24h | -0.03 | -4.6E-03 | 0.02    | 0.97    |
| 1h         | 24h | -0.02 | 2.1E-03  | 0.02    | 1.00    |
|            |     |       |          |         |         |

| Lysine   |     |       |       |         |         |
|----------|-----|-------|-------|---------|---------|
| <5m      | 15m | -0.09 | -0.02 | 0.06    | 0.98    |
| <5m      | 30m | -0.11 | -0.03 | 0.04    | 0.77    |
| <5m      | 1h  | -0.12 | -0.05 | 0.03    | 0.44    |
| <5m      | 24h | -0.15 | -0.07 | 3.1E-03 | 0.07    |
| 15m      | 30m | -0.08 | -0.02 | 0.04    | 0.94    |
| 15m      | 1h  | -0.09 | -0.03 | 0.03    | 0.61    |
| 15m      | 24h | -0.12 | -0.06 | 3.4E-03 | 0.07    |
| 30m      | 1h  | -0.08 | -0.01 | 0.05    | 0.96    |
| 30m      | 24h | -0.10 | -0.04 | 0.02    | 0.34    |
| 1h       | 24h | -0.09 | -0.03 | 0.03    | 0.75    |
| Creatine |     |       |       |         |         |
| <5m      | 15m | -0.10 | 0.04  | 0.18    | 0.93    |
| <5m      | 30m | -0.08 | 0.06  | 0.20    | 0.78    |
| <5m      | 1h  | -0.10 | 0.05  | 0.19    | 0.89    |
| <5m      | 24h | -0.12 | 0.03  | 0.17    | 0.99    |
| 15m      | 30m | -0.10 | 0.02  | 0.13    | 0.99    |
| 15m      | 1h  | -0.11 | 0.01  | 0.12    | 1.00    |
| 15m      | 24h | -0.13 | -0.02 | 0.10    | 1.00    |
| 30m      | 1h  | -0.13 | -0.01 | 0.10    | 1.00    |
| 30m      | 24h | -0.15 | -0.03 | 0.08    | 0.92    |
| 1h       | 24h | -0.13 | -0.02 | 0.09    | 0.99    |
| Choline  |     |       |       |         |         |
| <5m      | 15m | -1.82 | -0.81 | 0.19    | 0.17    |
| <5m      | 30m | -2.28 | -1.28 | -0.29   | 4.7E-03 |
| <5m      | 1h  | -2.90 | -1.90 | -0.91   | 6.1E-06 |
| <5m      | 24h | -4.28 | -3.29 | -2.29   | 9.9E-09 |
| 15m      | 30m | -1.27 | -0.47 | 0.33    | 0.49    |
| 15m      | 1h  | -1.89 | -1.09 | -0.29   | 2.4E-03 |
| 15m      | 24h | -3.27 | -2.47 | -1.67   | 9.9E-09 |
| 30m      | 1h  | -1.41 | -0.62 | 0.17    | 0.20    |
| 30m      | 24h | -2.80 | -2.01 | -1.21   | 1.2E-08 |
| 1h       | 24h | -2.18 | -1.39 | -0.60   | 3.8E-05 |
| PC       |     |       |       |         |         |
| <5m      | 15m | -0.11 | 0.12  | 0.35    | 0.59    |
| <5m      | 30m | -0.17 | 0.06  | 0.29    | 0.95    |

|         |     |       |          |      |         |
|---------|-----|-------|----------|------|---------|
| <5m     | 1h  | -0.05 | 0.17     | 0.40 | 0.22    |
| <5m     | 24h | 0.27  | 0.50     | 0.73 | 1.9E-07 |
| 15m     | 30m | -0.25 | -0.06    | 0.12 | 0.88    |
| 15m     | 1h  | -0.13 | 0.05     | 0.24 | 0.93    |
| 15m     | 24h | 0.20  | 0.38     | 0.56 | 8.7E-07 |
| 30m     | 1h  | -0.07 | 0.12     | 0.30 | 0.40    |
| 30m     | 24h | 0.26  | 0.44     | 0.63 | 1.7E-08 |
| 1h      | 24h | 0.15  | 0.33     | 0.51 | 2.3E-05 |
|         |     |       |          |      |         |
| GPC     |     |       |          |      |         |
| <5m     | 15m | 0.52  | 1.59     | 2.67 | 7.0E-04 |
| <5m     | 30m | 0.53  | 1.60     | 2.67 | 6.0E-04 |
| <5m     | 1h  | 0.90  | 1.97     | 3.03 | 1.3E-05 |
| <5m     | 24h | 2.12  | 3.19     | 4.26 | 9.9E-09 |
| 15m     | 30m | -0.85 | 0.01     | 0.86 | 1.00    |
| 15m     | 1h  | -0.48 | 0.37     | 1.23 | 0.75    |
| 15m     | 24h | 0.74  | 1.59     | 2.45 | 1.1E-05 |
| 30m     | 1h  | -0.48 | 0.37     | 1.22 | 0.75    |
| 30m     | 24h | 0.74  | 1.59     | 2.44 | 9.2E-06 |
| 1h      | 24h | 0.37  | 1.22     | 2.07 | 1.1E-03 |
|         |     |       |          |      |         |
| Taurine |     |       |          |      |         |
| <5m     | 15m | -0.46 | 0.02     | 0.49 | 1.00    |
| <5m     | 30m | -0.46 | 0.01     | 0.48 | 1.00    |
| <5m     | 1h  | -0.52 | -0.04    | 0.43 | 1.00    |
| <5m     | 24h | -0.22 | 0.25     | 0.73 | 0.57    |
| 15m     | 30m | -0.39 | -4.9E-03 | 0.38 | 1.00    |
| 15m     | 1h  | -0.44 | -0.06    | 0.32 | 0.99    |
| 15m     | 24h | -0.14 | 0.24     | 0.62 | 0.42    |
| 30m     | 1h  | -0.43 | -0.05    | 0.32 | 1.00    |
| 30m     | 24h | -0.13 | 0.24     | 0.62 | 0.38    |
| 1h      | 24h | -0.08 | 0.30     | 0.67 | 0.20    |
|         |     |       |          |      |         |
| Glucose |     |       |          |      |         |
| <5m     | 15m | 0.01  | 0.21     | 0.40 | 0.04    |
| <5m     | 30m | 0.06  | 0.26     | 0.46 | 4.0E-03 |
| <5m     | 1h  | 0.09  | 0.29     | 0.49 | 8.3E-04 |
| <5m     | 24h | 0.36  | 0.56     | 0.76 | 1.0E-08 |
| 15m     | 30m | -0.11 | 0.05     | 0.21 | 0.89    |

|              |     |         |         |       |         |
|--------------|-----|---------|---------|-------|---------|
| 15m          | 1h  | -0.07   | 0.08    | 0.24  | 0.58    |
| 15m          | 24h | 0.19    | 0.35    | 0.51  | 1.2E-07 |
| 30m          | 1h  | -0.12   | 0.03    | 0.19  | 0.98    |
| 30m          | 24h | 0.14    | 0.30    | 0.46  | 5.5E-06 |
| 1h           | 24h | 0.11    | 0.27    | 0.43  | 6.0E-05 |
|              |     |         |         |       |         |
| Myo-inositol |     |         |         |       |         |
| <5m          | 15m | -0.27   | 9.3E-04 | 0.27  | 1.00    |
| <5m          | 30m | -0.32   | -0.05   | 0.22  | 0.99    |
| <5m          | 1h  | -0.31   | -0.04   | 0.23  | 1.00    |
| <5m          | 24h | -0.09   | 0.18    | 0.45  | 0.36    |
| 15m          | 30m | -0.26   | -0.05   | 0.17  | 0.97    |
| 15m          | 1h  | -0.26   | -0.04   | 0.18  | 0.99    |
| 15m          | 24h | -0.04   | 0.18    | 0.40  | 0.16    |
| 30m          | 1h  | -0.21   | 0.01    | 0.22  | 1.00    |
| 30m          | 24h | 0.01    | 0.23    | 0.44  | 0.03    |
| 1h           | 24h | 2.5E-03 | 0.22    | 0.43  | 0.05    |
|              |     |         |         |       |         |
| Glycine      |     |         |         |       |         |
| <5m          | 15m | -0.21   | -0.05   | 0.11  | 0.91    |
| <5m          | 30m | -0.25   | -0.10   | 0.06  | 0.44    |
| <5m          | 1h  | -0.33   | -0.17   | -0.01 | 0.03    |
| <5m          | 24h | -0.51   | -0.35   | -0.20 | 9.6E-08 |
| 15m          | 30m | -0.17   | -0.05   | 0.08  | 0.84    |
| 15m          | 1h  | -0.25   | -0.12   | 0.01  | 0.08    |
| 15m          | 24h | -0.43   | -0.30   | -0.18 | 2.0E-08 |
| 30m          | 1h  | -0.20   | -0.07   | 0.05  | 0.50    |
| 30m          | 24h | -0.38   | -0.26   | -0.13 | 1.0E-06 |
| 1h           | 24h | -0.31   | -0.19   | -0.06 | 7.4E-04 |
|              |     |         |         |       |         |
| Glycerol     |     |         |         |       |         |
| <5m          | 15m | -0.13   | -0.06   | 0.01  | 0.10    |
| <5m          | 30m | -0.16   | -0.09   | -0.02 | 0.01    |
| <5m          | 1h  | -0.23   | -0.16   | -0.09 | 1.2E-07 |
| <5m          | 24h | -0.44   | -0.37   | -0.30 | 9.9E-09 |
| 15m          | 30m | -0.08   | -0.03   | 0.03  | 0.71    |
| 15m          | 1h  | -0.15   | -0.09   | -0.04 | 1.2E-04 |
| 15m          | 24h | -0.36   | -0.30   | -0.25 | 9.9E-09 |
| 30m          | 1h  | -0.12   | -0.07   | -0.01 | 0.01    |

|             |     |          |          |          |         |
|-------------|-----|----------|----------|----------|---------|
| 30m         | 24h | -0.33    | -0.28    | -0.22    | 9.9E-09 |
| 1h          | 24h | -0.27    | -0.21    | -0.16    | 9.9E-09 |
|             |     |          |          |          |         |
| Serine      |     |          |          |          |         |
| <5m         | 15m | -0.49    | -0.13    | 0.23     | 0.85    |
| <5m         | 30m | -0.50    | -0.14    | 0.22     | 0.82    |
| <5m         | 1h  | -0.54    | -0.18    | 0.18     | 0.62    |
| <5m         | 24h | -0.31    | 0.05     | 0.41     | 1.00    |
| 15m         | 30m | -0.29    | -0.01    | 0.28     | 1.00    |
| 15m         | 1h  | -0.34    | -0.05    | 0.24     | 0.99    |
| 15m         | 24h | -0.11    | 0.18     | 0.47     | 0.41    |
| 30m         | 1h  | -0.33    | -0.04    | 0.24     | 0.99    |
| 30m         | 24h | -0.10    | 0.19     | 0.47     | 0.36    |
| 1h          | 24h | -0.05    | 0.23     | 0.52     | 0.17    |
|             |     |          |          |          |         |
| Threonine   |     |          |          |          |         |
| <5m         | 15m | -0.05    | -0.01    | 0.02     | 0.68    |
| <5m         | 30m | -0.04    | -0.01    | 0.02     | 0.81    |
| <5m         | 1h  | -0.04    | -0.01    | 0.02     | 0.96    |
| <5m         | 24h | -0.01    | 0.02     | 0.05     | 0.58    |
| 15m         | 30m | -0.02    | 2.5E-03  | 0.03     | 1.00    |
| 15m         | 1h  | -0.02    | 0.01     | 0.03     | 0.93    |
| 15m         | 24h | 0.01     | 0.03     | 0.06     | 0.01    |
| 30m         | 1h  | -0.02    | 4.6E-03  | 0.03     | 0.99    |
| 30m         | 24h | 4.1E-03  | 0.03     | 0.05     | 0.01    |
| 1h          | 24h | -4.4E-04 | 0.02     | 0.05     | 0.06    |
|             |     |          |          |          |         |
| Glutathione |     |          |          |          |         |
| <5m         | 15m | -0.05    | -0.02    | 0.01     | 0.36    |
| <5m         | 30m | -0.06    | -0.03    | -3.4E-04 | 0.05    |
| <5m         | 1h  | -0.04    | -0.01    | 0.01     | 0.67    |
| <5m         | 24h | -0.03    | -1.0E-03 | 0.03     | 1.00    |
| 15m         | 30m | -0.03    | -0.01    | 0.01     | 0.75    |
| 15m         | 1h  | -0.02    | 0.01     | 0.03     | 0.97    |
| 15m         | 24h | 0.00     | 0.02     | 0.04     | 0.20    |
| 30m         | 1h  | -0.01    | 0.02     | 0.04     | 0.36    |
| 30m         | 24h | 0.01     | 0.03     | 0.05     | 0.01    |
| 1h          | 24h | -0.01    | 0.01     | 0.04     | 0.52    |
|             |     |          |          |          |         |

| Uracil   |     |          |          |         |         |
|----------|-----|----------|----------|---------|---------|
| <5m      | 15m | -0.03    | -2.0E-04 | 0.03    | 1.00    |
| <5m      | 30m | -0.03    | -0.01    | 0.02    | 0.99    |
| <5m      | 1h  | -0.04    | -0.01    | 0.01    | 0.64    |
| <5m      | 24h | -0.08    | -0.05    | -0.02   | 1.2E-05 |
| 15m      | 30m | -0.03    | -5.0E-03 | 0.02    | 0.98    |
| 15m      | 1h  | -0.04    | -0.01    | 0.01    | 0.44    |
| 15m      | 24h | -0.08    | -0.05    | -0.03   | 5.6E-08 |
| 30m      | 1h  | -0.03    | -0.01    | 0.01    | 0.79    |
| 30m      | 24h | -0.07    | -0.05    | -0.03   | 5.6E-07 |
| 1h       | 24h | -0.06    | -0.04    | -0.02   | 7.2E-05 |
| Uridine  |     |          |          |         |         |
| <5m      | 15m | -0.04    | -0.01    | 0.03    | 0.99    |
| <5m      | 30m | -0.02    | 0.01     | 0.04    | 0.91    |
| <5m      | 1h  | -0.03    | 0.01     | 0.04    | 0.96    |
| <5m      | 24h | -0.02    | 0.01     | 0.04    | 0.94    |
| 15m      | 30m | -0.01    | 0.02     | 0.04    | 0.45    |
| 15m      | 1h  | -0.01    | 0.01     | 0.04    | 0.61    |
| 15m      | 24h | -0.01    | 0.02     | 0.04    | 0.53    |
| 30m      | 1h  | -0.03    | -2.5E-03 | 0.02    | 1.00    |
| 30m      | 24h | -0.03    | -1.1E-03 | 0.03    | 1.00    |
| 1h       | 24h | -0.03    | 1.3E-03  | 0.03    | 1.00    |
| Fumarate |     |          |          |         |         |
| <5m      | 15m | -0.01    | -1.1E-03 | 3.3E-03 | 0.95    |
| <5m      | 30m | -0.01    | -1.2E-03 | 3.2E-03 | 0.94    |
| <5m      | 1h  | -0.01    | -8.9E-04 | 3.5E-03 | 0.98    |
| <5m      | 24h | -0.01    | -3.1E-03 | 1.3E-03 | 0.28    |
| 15m      | 30m | -3.6E-03 | -6.0E-05 | 3.5E-03 | 1.00    |
| 15m      | 1h  | -3.3E-03 | 2.6E-04  | 3.8E-03 | 1.00    |
| 15m      | 24h | -0.01    | -2.0E-03 | 1.5E-03 | 0.52    |
| 30m      | 1h  | -3.2E-03 | 3.2E-04  | 3.8E-03 | 1.00    |
| 30m      | 24h | -0.01    | -1.9E-03 | 1.6E-03 | 0.54    |
| 1h       | 24h | -0.01    | -2.3E-03 | 1.2E-03 | 0.39    |
| Tyrosine |     |          |          |         |         |
| <5m      | 15m | -0.04    | -0.01    | 0.02    | 0.98    |
| <5m      | 30m | -0.04    | -0.01    | 0.01    | 0.63    |

|               |     |          |          |          |         |
|---------------|-----|----------|----------|----------|---------|
| <5m           | 1h  | -0.06    | -0.03    | -3.0E-04 | 0.05    |
| <5m           | 24h | -0.08    | -0.05    | -0.02    | 2.2E-05 |
| 15m           | 30m | -0.03    | -0.01    | 0.01     | 0.85    |
| 15m           | 1h  | -0.05    | -0.02    | 8.6E-05  | 0.05    |
| 15m           | 24h | -0.07    | -0.05    | -0.02    | 2.5E-06 |
| 30m           | 1h  | -0.04    | -0.01    | 0.01     | 0.40    |
| 30m           | 24h | -0.06    | -0.04    | -0.01    | 1.5E-04 |
| 1h            | 24h | -0.05    | -0.02    | 1.2E-04  | 0.05    |
|               |     |          |          |          |         |
| Phenylalanine |     |          |          |          |         |
| <5m           | 15m | -0.14    | -0.03    | 0.08     | 0.93    |
| <5m           | 30m | -0.16    | -0.06    | 0.05     | 0.58    |
| <5m           | 1h  | -0.22    | -0.11    | -2.3E-03 | 0.04    |
| <5m           | 24h | -0.30    | -0.19    | -0.09    | 2.0E-05 |
| 15m           | 30m | -0.11    | -0.03    | 0.06     | 0.91    |
| 15m           | 1h  | -0.16    | -0.08    | 0.01     | 0.09    |
| 15m           | 24h | -0.25    | -0.16    | -0.08    | 7.1E-06 |
| 30m           | 1h  | -0.14    | -0.05    | 0.03     | 0.44    |
| 30m           | 24h | -0.22    | -0.14    | -0.05    | 2.0E-04 |
| 1h            | 24h | -0.17    | -0.08    | 8.5E-04  | 0.05    |
|               |     |          |          |          |         |
| Histidine     |     |          |          |          |         |
| <5m           | 15m | -0.02    | -0.01    | 0.01     | 0.92    |
| <5m           | 30m | -0.02    | -3.3E-03 | 0.01     | 0.98    |
| <5m           | 1h  | -0.02    | -0.01    | 0.01     | 0.65    |
| <5m           | 24h | -0.01    | 0.01     | 0.02     | 0.78    |
| 15m           | 30m | -0.01    | 1.7E-03  | 0.02     | 1.00    |
| 15m           | 1h  | -0.02    | -3.2E-03 | 0.01     | 0.96    |
| 15m           | 24h | 0.00     | 0.01     | 0.03     | 0.10    |
| 30m           | 1h  | -0.02    | -4.9E-03 | 0.01     | 0.84    |
| 30m           | 24h | -3.0E-03 | 0.01     | 0.02     | 0.21    |
| 1h            | 24h | 1.9E-03  | 0.02     | 0.03     | 0.02    |
|               |     |          |          |          |         |
| Hypoxanthine  |     |          |          |          |         |
| <5m           | 15m | -0.03    | 0.02     | 0.07     | 0.82    |
| <5m           | 30m | -0.04    | 0.01     | 0.06     | 0.99    |
| <5m           | 1h  | -0.04    | 0.01     | 0.06     | 0.99    |
| <5m           | 24h | -0.08    | -0.03    | 0.02     | 0.46    |
| 15m           | 30m | -0.05    | -0.01    | 0.03     | 0.96    |

|             |     |          |          |         |         |
|-------------|-----|----------|----------|---------|---------|
| 15m         | 1h  | -0.05    | -0.01    | 0.03    | 0.93    |
| 15m         | 24h | -0.09    | -0.05    | -0.01   | 0.01    |
| 30m         | 1h  | -0.04    | -1.5E-03 | 0.04    | 1.00    |
| 30m         | 24h | -0.08    | -0.04    | 4.3E-04 | 0.05    |
| 1h          | 24h | -0.08    | -0.04    | 1.9E-03 | 0.07    |
|             |     |          |          |         |         |
| Inosine     |     |          |          |         |         |
| <5m         | 15m | -0.02    | -0.01    | 0.01    | 0.92    |
| <5m         | 30m | -0.01    | 0.01     | 0.03    | 0.89    |
| <5m         | 1h  | -0.01    | 0.01     | 0.03    | 0.78    |
| <5m         | 24h | -0.01    | 4.3E-03  | 0.02    | 0.97    |
| 15m         | 30m | -3.2E-03 | 0.01     | 0.03    | 0.19    |
| 15m         | 1h  | -1.7E-03 | 0.01     | 0.03    | 0.11    |
| 15m         | 24h | -0.01    | 0.01     | 0.03    | 0.36    |
| 30m         | 1h  | -0.01    | 1.5E-03  | 0.02    | 1.00    |
| 30m         | 24h | -0.02    | -2.0E-03 | 0.01    | 1.00    |
| 1h          | 24h | -0.02    | -3.5E-03 | 0.01    | 0.97    |
|             |     |          |          |         |         |
| Formate     |     |          |          |         |         |
| <5m         | 15m | -7.9E-06 | 0.01     | 0.02    | 0.05    |
| <5m         | 30m | 2.9E-03  | 0.01     | 0.02    | 2.7E-03 |
| <5m         | 1h  | 0.01     | 0.02     | 0.02    | 1.2E-05 |
| <5m         | 24h | 0.01     | 0.02     | 0.03    | 1.9E-08 |
| 15m         | 30m | -3.9E-03 | 2.9E-03  | 0.01    | 0.76    |
| 15m         | 1h  | 3.6E-04  | 0.01     | 0.01    | 0.03    |
| 15m         | 24h | 0.01     | 0.01     | 0.02    | 3.7E-05 |
| 30m         | 1h  | -2.5E-03 | 4.2E-03  | 0.01    | 0.41    |
| 30m         | 24h | 2.3E-03  | 0.01     | 0.02    | 2.9E-03 |
| 1h          | 24h | -1.9E-03 | 4.7E-03  | 0.01    | 0.29    |
|             |     |          |          |         |         |
| Niacinamide |     |          |          |         |         |
| <5m         | 15m | 2.5E-04  | 0.01     | 0.01    | 0.04    |
| <5m         | 30m | 1.4E-03  | 0.01     | 0.02    | 0.01    |
| <5m         | 1h  | 6.3E-04  | 0.01     | 0.01    | 0.03    |
| <5m         | 24h | -9.8E-04 | 0.01     | 0.01    | 0.13    |
| 15m         | 30m | -4.4E-03 | 1.1E-03  | 0.01    | 0.98    |
| 15m         | 1h  | -0.01    | 3.4E-04  | 0.01    | 1.00    |
| 15m         | 24h | -0.01    | -1.3E-03 | 4.2E-03 | 0.97    |
| 30m         | 1h  | -0.01    | -8.1E-04 | 4.6E-03 | 0.99    |



|     |     |       |          |         |      |
|-----|-----|-------|----------|---------|------|
| 30m | 24h | -0.01 | -2.4E-03 | 3.0E-03 | 0.73 |
| 1h  | 24h | -0.01 | -1.6E-03 | 3.8E-03 | 0.92 |

<sup>a</sup>VLDL: Very low-density lipoprotein

<sup>b</sup>3-HB: 3-hydroxybutyrate

<sup>c</sup>PC: Phosphocholine

<sup>d</sup>GPC: Glycerophosphocholine

42

**Table S3.** Tukey-Kramer Post-Hoc Results for Fetal Surface of Placenta

| VLDL       |         |          |          |          |         |
|------------|---------|----------|----------|----------|---------|
| Group 1    | Group 2 | Lower CI | Estimate | Upper CI | p-value |
| <5m        | 15m     | -0.45    | -0.07    | 0.32     | 0.99    |
| <5m        | 30m     | -0.39    | -7.7E-04 | 0.39     | 1.00    |
| <5m        | 1h      | -0.35    | 0.04     | 0.42     | 1.00    |
| <5m        | 24h     | -0.14    | 0.25     | 0.63     | 0.39    |
| 15m        | 30m     | -0.25    | 0.06     | 0.38     | 0.98    |
| 15m        | 1h      | -0.21    | 0.10     | 0.42     | 0.90    |
| 15m        | 24h     | 2.3E-04  | 0.31     | 0.63     | 0.05    |
| 30m        | 1h      | -0.27    | 0.04     | 0.35     | 1.00    |
| 30m        | 24h     | -0.06    | 0.25     | 0.56     | 0.18    |
| 1h         | 24h     | -0.10    | 0.21     | 0.52     | 0.33    |
| Isoleucine |         |          |          |          |         |
| <5m        | 15m     | -0.05    | -0.01    | 0.02     | 0.73    |
| <5m        | 30m     | -0.04    | -0.01    | 0.02     | 0.91    |
| <5m        | 1h      | -0.05    | -0.01    | 0.02     | 0.80    |
| <5m        | 24h     | -0.06    | -0.03    | 5.0E-03  | 0.13    |
| 15m        | 30m     | -0.02    | 4.8E-03  | 0.03     | 0.99    |
| 15m        | 1h      | -0.03    | 1.6E-03  | 0.03     | 1.00    |
| 15m        | 24h     | -0.04    | -0.01    | 0.01     | 0.65    |
| 30m        | 1h      | -0.03    | -3.1E-03 | 0.02     | 1.00    |
| 30m        | 24h     | -0.04    | -0.02    | 0.01     | 0.34    |
| 1h         | 24h     | -0.04    | -0.01    | 0.01     | 0.54    |
| Leucine    |         |          |          |          |         |
| <5m        | 15m     | -0.25    | -0.06    | 0.13     | 0.92    |
| <5m        | 30m     | -0.20    | -0.01    | 0.18     | 1.00    |
| <5m        | 1h      | -0.20    | -0.01    | 0.18     | 1.00    |
| <5m        | 24h     | -0.25    | -0.05    | 0.14     | 0.93    |
| 15m        | 30m     | -0.11    | 0.05     | 0.20     | 0.93    |
| 15m        | 1h      | -0.10    | 0.05     | 0.21     | 0.89    |

|         |     |        |          |        |         |
|---------|-----|--------|----------|--------|---------|
| 15m     | 24h | -0.15  | 3.8E-03  | 0.16   | 1.00    |
| 30m     | 1h  | -0.15  | 0.01     | 0.16   | 1.00    |
| 30m     | 24h | -0.20  | -0.04    | 0.11   | 0.94    |
| 1h      | 24h | -0.20  | -0.05    | 0.11   | 0.91    |
|         |     |        |          |        |         |
| Valine  |     |        |          |        |         |
| <5m     | 15m | -0.08  | 2.8E-03  | 0.08   | 1.00    |
| <5m     | 30m | -0.08  | 2.5E-03  | 0.08   | 1.00    |
| <5m     | 1h  | -0.07  | 0.01     | 0.09   | 1.00    |
| <5m     | 24h | -0.11  | -0.02    | 0.06   | 0.91    |
| 15m     | 30m | -0.07  | -3.9E-04 | 0.07   | 1.00    |
| 15m     | 1h  | -0.06  | 4.7E-03  | 0.07   | 1.00    |
| 15m     | 24h | -0.09  | -0.03    | 0.04   | 0.76    |
| 30m     | 1h  | -0.06  | 0.01     | 0.07   | 1.00    |
| 30m     | 24h | -0.09  | -0.03    | 0.04   | 0.77    |
| 1h      | 24h | -0.10  | -0.03    | 0.03   | 0.63    |
|         |     |        |          |        |         |
| 3-HB    |     |        |          |        |         |
| <5m     | 15m | -0.20  | 0.03     | 0.25   | 1.00    |
| <5m     | 30m | -0.24  | -0.02    | 0.21   | 1.00    |
| <5m     | 1h  | -0.24  | -0.02    | 0.20   | 1.00    |
| <5m     | 24h | -0.21  | 0.02     | 0.24   | 1.00    |
| 15m     | 30m | -0.22  | -0.04    | 0.14   | 0.97    |
| 15m     | 1h  | -0.23  | -0.05    | 0.13   | 0.95    |
| 15m     | 24h | -0.19  | -0.01    | 0.17   | 1.00    |
| 30m     | 1h  | -0.18  | -0.01    | 0.17   | 1.00    |
| 30m     | 24h | -0.15  | 0.03     | 0.21   | 0.99    |
| 1h      | 24h | -0.14  | 0.04     | 0.22   | 0.98    |
|         |     |        |          |        |         |
| Lactate |     |        |          |        |         |
| <5m     | 15m | -5.98  | -2.21    | 1.56   | 0.48    |
| <5m     | 30m | -8.05  | -4.30    | -0.56  | 0.02    |
| <5m     | 1h  | -10.31 | -6.57    | -2.82  | 3.9E-05 |
| <5m     | 24h | -17.99 | -14.24   | -10.50 | 9.9E-09 |
| 15m     | 30m | -5.14  | -2.09    | 0.95   | 0.32    |
| 15m     | 1h  | -7.41  | -4.36    | -1.31  | 1.2E-03 |
| 15m     | 24h | -15.08 | -12.04   | -8.99  | 9.9E-09 |
| 30m     | 1h  | -5.28  | -2.27    | 0.75   | 0.23    |
| 30m     | 24h | -12.96 | -9.94    | -6.93  | 9.9E-09 |

|                  |     |         |          |       |         |
|------------------|-----|---------|----------|-------|---------|
| 1h               | 24h | -10.69  | -7.68    | -4.66 | 1.2E-08 |
| <b>Alanine</b>   |     |         |          |       |         |
| <5m              | 15m | -0.18   | 0.03     | 0.23  | 1.00    |
| <5m              | 30m | -0.18   | 0.02     | 0.23  | 1.00    |
| <5m              | 1h  | -0.20   | 0.01     | 0.21  | 1.00    |
| <5m              | 24h | -0.31   | -0.10    | 0.10  | 0.62    |
| 15m              | 30m | -0.17   | -3.7E-03 | 0.16  | 1.00    |
| 15m              | 1h  | -0.18   | -0.02    | 0.15  | 1.00    |
| 15m              | 24h | -0.30   | -0.13    | 0.04  | 0.20    |
| 30m              | 1h  | -0.18   | -0.01    | 0.15  | 1.00    |
| 30m              | 24h | -0.29   | -0.13    | 0.04  | 0.22    |
| 1h               | 24h | -0.28   | -0.11    | 0.05  | 0.33    |
| <b>Acetate</b>   |     |         |          |       |         |
| <5m              | 15m | -0.06   | -0.01    | 0.05  | 1.00    |
| <5m              | 30m | -0.07   | -0.02    | 0.04  | 0.92    |
| <5m              | 1h  | -0.07   | -0.01    | 0.04  | 0.96    |
| <5m              | 24h | -0.07   | -0.01    | 0.04  | 0.96    |
| 15m              | 30m | -0.05   | -0.01    | 0.04  | 0.98    |
| 15m              | 1h  | -0.05   | -0.01    | 0.04  | 0.99    |
| 15m              | 24h | -0.05   | -0.01    | 0.04  | 0.99    |
| 30m              | 1h  | -0.04   | 2.8E-03  | 0.05  | 1.00    |
| 30m              | 24h | -0.04   | 2.8E-03  | 0.05  | 1.00    |
| 1h               | 24h | -0.04   | -7.0E-05 | 0.04  | 1.00    |
| <b>Acetone</b>   |     |         |          |       |         |
| <5m              | 15m | -0.03   | 0.01     | 0.05  | 0.99    |
| <5m              | 30m | -0.04   | -8.1E-04 | 0.04  | 1.00    |
| <5m              | 1h  | -0.04   | 0.01     | 0.05  | 0.99    |
| <5m              | 24h | -0.01   | 0.03     | 0.07  | 0.18    |
| 15m              | 30m | -0.04   | -0.01    | 0.03  | 0.96    |
| 15m              | 1h  | -0.03   | -9.9E-04 | 0.03  | 1.00    |
| 15m              | 24h | -0.01   | 0.03     | 0.06  | 0.21    |
| 30m              | 1h  | -0.03   | 0.01     | 0.04  | 0.98    |
| 30m              | 24h | 6.7E-04 | 0.03     | 0.07  | 0.04    |
| 1h               | 24h | -0.01   | 0.03     | 0.06  | 0.17    |
| <b>Glutamate</b> |     |         |          |       |         |

|           |     |       |          |         |         |
|-----------|-----|-------|----------|---------|---------|
| <5m       | 15m | -0.23 | 0.11     | 0.45    | 0.90    |
| <5m       | 30m | -0.31 | 0.03     | 0.36    | 1.00    |
| <5m       | 1h  | -0.31 | 0.03     | 0.37    | 1.00    |
| <5m       | 24h | -0.08 | 0.26     | 0.60    | 0.23    |
| 15m       | 30m | -0.36 | -0.09    | 0.19    | 0.91    |
| 15m       | 1h  | -0.36 | -0.08    | 0.19    | 0.92    |
| 15m       | 24h | -0.13 | 0.15     | 0.42    | 0.59    |
| 30m       | 1h  | -0.27 | 4.7E-03  | 0.28    | 1.00    |
| 30m       | 24h | -0.04 | 0.23     | 0.50    | 0.14    |
| 1h        | 24h | -0.05 | 0.23     | 0.50    | 0.15    |
|           |     |       |          |         |         |
| Succinate |     |       |          |         |         |
| <5m       | 15m | -0.06 | 8.4E-04  | 0.06    | 1.00    |
| <5m       | 30m | -0.07 | -0.01    | 0.04    | 0.95    |
| <5m       | 1h  | -0.10 | -0.04    | 0.01    | 0.22    |
| <5m       | 24h | -0.14 | -0.08    | -0.03   | 6.1E-04 |
| 15m       | 30m | -0.06 | -0.02    | 0.03    | 0.88    |
| 15m       | 1h  | -0.09 | -0.04    | 1.7E-03 | 0.07    |
| 15m       | 24h | -0.13 | -0.08    | -0.04   | 1.1E-05 |
| 30m       | 1h  | -0.07 | -0.03    | 0.02    | 0.41    |
| 30m       | 24h | -0.11 | -0.07    | -0.02   | 4.1E-04 |
| 1h        | 24h | -0.09 | -0.04    | 4.1E-03 | 0.09    |
|           |     |       |          |         |         |
| Glutamine |     |       |          |         |         |
| <5m       | 15m | -0.08 | 0.03     | 0.14    | 0.94    |
| <5m       | 30m | -0.12 | -4.5E-03 | 0.11    | 1.00    |
| <5m       | 1h  | -0.14 | -0.02    | 0.09    | 0.98    |
| <5m       | 24h | -0.09 | 0.02     | 0.13    | 0.99    |
| 15m       | 30m | -0.13 | -0.04    | 0.06    | 0.82    |
| 15m       | 1h  | -0.15 | -0.05    | 0.04    | 0.46    |
| 15m       | 24h | -0.10 | -0.01    | 0.08    | 1.00    |
| 30m       | 1h  | -0.11 | -0.02    | 0.07    | 0.98    |
| 30m       | 24h | -0.06 | 0.02     | 0.11    | 0.94    |
| 1h        | 24h | -0.05 | 0.04     | 0.13    | 0.65    |
|           |     |       |          |         |         |
| Citrate   |     |       |          |         |         |
| <5m       | 15m | -0.06 | 0.01     | 0.08    | 1.00    |
| <5m       | 30m | -0.09 | -0.02    | 0.05    | 0.96    |
| <5m       | 1h  | -0.10 | -0.03    | 0.04    | 0.84    |

|            |     |          |          |      |         |
|------------|-----|----------|----------|------|---------|
| <5m        | 24h | -3.4E-03 | 0.07     | 0.14 | 0.07    |
| 15m        | 30m | -0.08    | -0.02    | 0.03 | 0.76    |
| 15m        | 1h  | -0.09    | -0.03    | 0.02 | 0.49    |
| 15m        | 24h | 2.6E-03  | 0.06     | 0.12 | 0.04    |
| 30m        | 1h  | -0.07    | -0.01    | 0.05 | 0.99    |
| 30m        | 24h | 0.03     | 0.08     | 0.14 | 6.9E-04 |
| 1h         | 24h | 0.04     | 0.09     | 0.15 | 1.3E-04 |
|            |     |          |          |      |         |
| Aspartate  |     |          |          |      |         |
| <5m        | 15m | -0.04    | -0.01    | 0.02 | 0.98    |
| <5m        | 30m | -0.04    | -0.01    | 0.02 | 0.98    |
| <5m        | 1h  | -0.03    | -0.01    | 0.02 | 0.99    |
| <5m        | 24h | -0.03    | -1.2E-03 | 0.03 | 1.00    |
| 15m        | 30m | -0.02    | -1.4E-05 | 0.02 | 1.00    |
| 15m        | 1h  | -0.02    | 1.0E-03  | 0.02 | 1.00    |
| 15m        | 24h | -0.02    | 4.8E-03  | 0.03 | 0.98    |
| 30m        | 1h  | -0.02    | 1.0E-03  | 0.02 | 1.00    |
| 30m        | 24h | -0.02    | 4.8E-03  | 0.03 | 0.98    |
| 1h         | 24h | -0.02    | 3.8E-03  | 0.03 | 0.99    |
|            |     |          |          |      |         |
| Asparagine |     |          |          |      |         |
| <5m        | 15m | -0.04    | -0.01    | 0.03 | 0.98    |
| <5m        | 30m | -0.03    | 1.3E-03  | 0.03 | 1.00    |
| <5m        | 1h  | -0.03    | 3.9E-03  | 0.04 | 1.00    |
| <5m        | 24h | -0.01    | 0.02     | 0.05 | 0.30    |
| 15m        | 30m | -0.02    | 0.01     | 0.03 | 0.93    |
| 15m        | 1h  | -0.02    | 0.01     | 0.04 | 0.83    |
| 15m        | 24h | 2.4E-03  | 0.03     | 0.05 | 0.02    |
| 30m        | 1h  | -0.02    | 2.6E-03  | 0.03 | 1.00    |
| 30m        | 24h | -4.8E-03 | 0.02     | 0.05 | 0.16    |
| 1h         | 24h | -0.01    | 0.02     | 0.04 | 0.28    |
|            |     |          |          |      |         |
| Lysine     |     |          |          |      |         |
| <5m        | 15m | -0.07    | -0.01    | 0.05 | 1.00    |
| <5m        | 30m | -0.04    | 0.02     | 0.08 | 0.92    |
| <5m        | 1h  | -0.04    | 0.02     | 0.08 | 0.89    |
| <5m        | 24h | -0.05    | 0.01     | 0.07 | 0.99    |
| 15m        | 30m | -0.02    | 0.03     | 0.08 | 0.57    |
| 15m        | 1h  | -0.02    | 0.03     | 0.08 | 0.51    |

|          |     |       |          |          |         |
|----------|-----|-------|----------|----------|---------|
| 15m      | 24h | -0.03 | 0.02     | 0.07     | 0.86    |
| 30m      | 1h  | -0.05 | 1.8E-03  | 0.05     | 1.00    |
| 30m      | 24h | -0.06 | -0.01    | 0.04     | 0.99    |
| 1h       | 24h | -0.06 | -0.01    | 0.04     | 0.97    |
|          |     |       |          |          |         |
| Creatine |     |       |          |          |         |
| <5m      | 15m | -0.11 | 0.32     | 0.75     | 0.24    |
| <5m      | 30m | -0.05 | 0.38     | 0.80     | 0.11    |
| <5m      | 1h  | -0.13 | 0.30     | 0.72     | 0.30    |
| <5m      | 24h | -0.20 | 0.22     | 0.65     | 0.60    |
| 15m      | 30m | -0.29 | 0.06     | 0.40     | 0.99    |
| 15m      | 1h  | -0.37 | -0.02    | 0.32     | 1.00    |
| 15m      | 24h | -0.44 | -0.10    | 0.25     | 0.94    |
| 30m      | 1h  | -0.42 | -0.08    | 0.26     | 0.97    |
| 30m      | 24h | -0.50 | -0.16    | 0.19     | 0.71    |
| 1h       | 24h | -0.42 | -0.08    | 0.27     | 0.97    |
|          |     |       |          |          |         |
| Choline  |     |       |          |          |         |
| <5m      | 15m | -1.37 | -0.41    | 0.55     | 0.76    |
| <5m      | 30m | -1.82 | -0.86    | 0.09     | 0.09    |
| <5m      | 1h  | -1.91 | -0.95    | -3.3E-04 | 0.05    |
| <5m      | 24h | -3.38 | -2.43    | -1.48    | 1.2E-08 |
| 15m      | 30m | -1.23 | -0.45    | 0.32     | 0.49    |
| 15m      | 1h  | -1.32 | -0.54    | 0.23     | 0.30    |
| 15m      | 24h | -2.79 | -2.02    | -1.24    | 1.1E-08 |
| 30m      | 1h  | -0.86 | -0.09    | 0.68     | 1.00    |
| 30m      | 24h | -2.33 | -1.56    | -0.80    | 1.3E-06 |
| 1h       | 24h | -2.24 | -1.47    | -0.71    | 5.5E-06 |
|          |     |       |          |          |         |
| PC       |     |       |          |          |         |
| <5m      | 15m | 0.01  | 0.24     | 0.48     | 0.04    |
| <5m      | 30m | -0.03 | 0.20     | 0.44     | 0.12    |
| <5m      | 1h  | -0.04 | 0.20     | 0.43     | 0.14    |
| <5m      | 24h | 0.27  | 0.50     | 0.73     | 3.5E-07 |
| 15m      | 30m | -0.23 | -0.04    | 0.15     | 0.98    |
| 15m      | 1h  | -0.23 | -0.04    | 0.15     | 0.97    |
| 15m      | 24h | 0.07  | 0.26     | 0.45     | 2.4E-03 |
| 30m      | 1h  | -0.19 | -4.3E-03 | 0.18     | 1.00    |
| 30m      | 24h | 0.11  | 0.30     | 0.49     | 0.00    |

|              |     |       |         |      |         |
|--------------|-----|-------|---------|------|---------|
| 1h           | 24h | 0.11  | 0.30    | 0.49 | 0.00    |
| GPC          |     |       |         |      |         |
| <5m          | 15m | -0.27 | 0.48    | 1.24 | 0.39    |
| <5m          | 30m | -0.25 | 0.49    | 1.24 | 0.36    |
| <5m          | 1h  | 0.06  | 0.80    | 1.55 | 0.03    |
| <5m          | 24h | 0.72  | 1.46    | 2.21 | 3.5E-06 |
| 15m          | 30m | -0.60 | 0.01    | 0.62 | 1.00    |
| 15m          | 1h  | -0.29 | 0.32    | 0.93 | 0.59    |
| 15m          | 24h | 0.37  | 0.98    | 1.59 | 1.9E-04 |
| 30m          | 1h  | -0.29 | 0.31    | 0.91 | 0.61    |
| 30m          | 24h | 0.37  | 0.97    | 1.57 | 1.9E-04 |
| 1h           | 24h | 0.06  | 0.66    | 1.26 | 0.02    |
| Taurine      |     |       |         |      |         |
| <5m          | 15m | -0.21 | 0.25    | 0.71 | 0.56    |
| <5m          | 30m | -0.30 | 0.16    | 0.62 | 0.87    |
| <5m          | 1h  | -0.09 | 0.37    | 0.83 | 0.18    |
| <5m          | 24h | -0.09 | 0.37    | 0.83 | 0.18    |
| 15m          | 30m | -0.47 | -0.09   | 0.28 | 0.96    |
| 15m          | 1h  | -0.26 | 0.12    | 0.49 | 0.91    |
| 15m          | 24h | -0.26 | 0.12    | 0.49 | 0.91    |
| 30m          | 1h  | -0.16 | 0.21    | 0.58 | 0.53    |
| 30m          | 24h | -0.16 | 0.21    | 0.58 | 0.52    |
| 1h           | 24h | -0.37 | 1.5E-03 | 0.37 | 1.00    |
| Glucose      |     |       |         |      |         |
| <5m          | 15m | -0.26 | 0.19    | 0.64 | 0.76    |
| <5m          | 30m | -0.33 | 0.12    | 0.57 | 0.95    |
| <5m          | 1h  | -0.08 | 0.37    | 0.82 | 0.16    |
| <5m          | 24h | -0.06 | 0.39    | 0.84 | 0.12    |
| 15m          | 30m | -0.44 | -0.07   | 0.29 | 0.98    |
| 15m          | 1h  | -0.19 | 0.18    | 0.54 | 0.66    |
| 15m          | 24h | -0.17 | 0.20    | 0.56 | 0.57    |
| 30m          | 1h  | -0.11 | 0.25    | 0.61 | 0.30    |
| 30m          | 24h | -0.09 | 0.27    | 0.63 | 0.23    |
| 1h           | 24h | -0.34 | 0.02    | 0.38 | 1.00    |
| Myo-inositol |     |       |         |      |         |

|          |     |       |          |       |         |
|----------|-----|-------|----------|-------|---------|
| <5m      | 15m | -0.51 | -0.02    | 0.48  | 1.00    |
| <5m      | 30m | -0.60 | -0.11    | 0.37  | 0.97    |
| <5m      | 1h  | -0.59 | -0.10    | 0.38  | 0.98    |
| <5m      | 24h | -0.55 | -0.07    | 0.42  | 1.00    |
| 15m      | 30m | -0.49 | -0.10    | 0.30  | 0.96    |
| 15m      | 1h  | -0.48 | -0.09    | 0.31  | 0.97    |
| 15m      | 24h | -0.45 | -0.05    | 0.35  | 1.00    |
| 30m      | 1h  | -0.38 | 0.01     | 0.40  | 1.00    |
| 30m      | 24h | -0.35 | 0.05     | 0.44  | 1.00    |
| 1h       | 24h | -0.36 | 0.04     | 0.43  | 1.00    |
| Glycine  |     |       |          |       |         |
| <5m      | 15m | -0.14 | 0.01     | 0.15  | 1.00    |
| <5m      | 30m | -0.15 | -0.01    | 0.13  | 1.00    |
| <5m      | 1h  | -0.14 | -2.3E-03 | 0.14  | 1.00    |
| <5m      | 24h | -0.27 | -0.13    | 0.01  | 0.09    |
| 15m      | 30m | -0.13 | -0.02    | 0.10  | 1.00    |
| 15m      | 1h  | -0.12 | -0.01    | 0.11  | 1.00    |
| 15m      | 24h | -0.25 | -0.14    | -0.02 | 0.01    |
| 30m      | 1h  | -0.11 | 0.01     | 0.12  | 1.00    |
| 30m      | 24h | -0.23 | -0.12    | -0.01 | 0.03    |
| 1h       | 24h | -0.24 | -0.13    | -0.01 | 0.02    |
| Glycerol |     |       |          |       |         |
| <5m      | 15m | -0.09 | -0.02    | 0.04  | 0.87    |
| <5m      | 30m | -0.11 | -0.04    | 0.02  | 0.30    |
| <5m      | 1h  | -0.12 | -0.05    | 0.01  | 0.15    |
| <5m      | 24h | -0.31 | -0.24    | -0.18 | 9.9E-09 |
| 15m      | 30m | -0.07 | -0.02    | 0.03  | 0.75    |
| 15m      | 1h  | -0.08 | -0.03    | 0.02  | 0.46    |
| 15m      | 24h | -0.27 | -0.22    | -0.17 | 9.9E-09 |
| 30m      | 1h  | -0.06 | -0.01    | 0.04  | 0.99    |
| 30m      | 24h | -0.25 | -0.20    | -0.15 | 9.9E-09 |
| 1h       | 24h | -0.24 | -0.19    | -0.14 | 9.9E-09 |
| Serine   |     |       |          |       |         |
| <5m      | 15m | -0.27 | 0.07     | 0.41  | 0.97    |
| <5m      | 30m | -0.34 | -0.01    | 0.33  | 1.00    |
| <5m      | 1h  | -0.21 | 0.12     | 0.46  | 0.84    |



|             |     |          |          |         |         |
|-------------|-----|----------|----------|---------|---------|
| <5m         | 24h | -0.31    | 0.03     | 0.36    | 1.00    |
| 15m         | 30m | -0.36    | -0.08    | 0.19    | 0.92    |
| 15m         | 1h  | -0.22    | 0.05     | 0.33    | 0.99    |
| 15m         | 24h | -0.32    | -0.05    | 0.23    | 0.99    |
| 30m         | 1h  | -0.14    | 0.13     | 0.40    | 0.66    |
| 30m         | 24h | -0.24    | 0.03     | 0.30    | 1.00    |
| 1h          | 24h | -0.37    | -0.10    | 0.17    | 0.85    |
|             |     |          |          |         |         |
| Threonine   |     |          |          |         |         |
| <5m         | 15m | -0.03    | 0.00     | 0.03    | 1.00    |
| <5m         | 30m | -0.04    | -0.01    | 0.02    | 0.96    |
| <5m         | 1h  | -0.03    | -1.3E-03 | 0.03    | 1.00    |
| <5m         | 24h | 4.8E-03  | 0.04     | 0.07    | 0.01    |
| 15m         | 30m | -0.03    | -0.01    | 0.02    | 0.98    |
| 15m         | 1h  | -0.02    | 1.3E-03  | 0.03    | 1.00    |
| 15m         | 24h | 0.01     | 0.04     | 0.06    | 4.6E-04 |
| 30m         | 1h  | -0.02    | 0.01     | 0.03    | 0.95    |
| 30m         | 24h | 0.02     | 0.04     | 0.07    | 4.0E-05 |
| 1h          | 24h | 0.01     | 0.04     | 0.06    | 6.8E-04 |
|             |     |          |          |         |         |
| Glutathione |     |          |          |         |         |
| <5m         | 15m | -0.04    | -0.01    | 0.02    | 0.84    |
| <5m         | 30m | -0.04    | -0.01    | 0.02    | 0.91    |
| <5m         | 1h  | -0.04    | -0.02    | 0.01    | 0.51    |
| <5m         | 24h | -0.02    | 0.01     | 0.04    | 0.78    |
| 15m         | 30m | -0.02    | 1.8E-03  | 0.02    | 1.00    |
| 15m         | 1h  | -0.03    | -0.01    | 0.02    | 0.96    |
| 15m         | 24h | -6.6E-04 | 0.02     | 0.04    | 0.06    |
| 30m         | 1h  | -0.03    | -0.01    | 0.01    | 0.89    |
| 30m         | 24h | -2.3E-03 | 0.02     | 0.04    | 0.10    |
| 1h          | 24h | 4.9E-03  | 0.03     | 0.05    | 0.01    |
|             |     |          |          |         |         |
| Uracil      |     |          |          |         |         |
| <5m         | 15m | -0.02    | 1.9E-03  | 0.02    | 1.00    |
| <5m         | 30m | -0.02    | 3.6E-03  | 0.02    | 0.99    |
| <5m         | 1h  | -0.02    | 2.9E-03  | 0.02    | 1.00    |
| <5m         | 24h | -0.04    | -0.02    | 1.7E-03 | 0.09    |
| 15m         | 30m | -0.02    | 1.7E-03  | 0.02    | 1.00    |
| 15m         | 1h  | -0.02    | 1.0E-03  | 0.02    | 1.00    |

|          |     |          |          |          |         |
|----------|-----|----------|----------|----------|---------|
| 15m      | 24h | -0.04    | -0.02    | -4.0E-03 | 0.01    |
| 30m      | 1h  | -0.02    | -7.0E-04 | 0.02     | 1.00    |
| 30m      | 24h | -0.04    | -0.02    | -0.01    | 2.6E-03 |
| 1h       | 24h | -0.04    | -0.02    | -0.01    | 3.8E-03 |
|          |     |          |          |          |         |
| Uridine  |     |          |          |          |         |
| <5m      | 15m | -0.03    | -0.01    | 0.02     | 0.97    |
| <5m      | 30m | -0.04    | -0.02    | 0.01     | 0.55    |
| <5m      | 1h  | -0.04    | -0.01    | 0.02     | 0.83    |
| <5m      | 24h | -0.03    | -0.01    | 0.02     | 0.97    |
| 15m      | 30m | -0.03    | -0.01    | 0.01     | 0.80    |
| 15m      | 1h  | -0.03    | -4.2E-03 | 0.02     | 0.99    |
| 15m      | 24h | -0.02    | 1.7E-04  | 0.02     | 1.00    |
| 30m      | 1h  | -0.02    | 4.8E-03  | 0.03     | 0.98    |
| 30m      | 24h | -0.01    | 0.01     | 0.03     | 0.79    |
| 1h       | 24h | -0.02    | 4.4E-03  | 0.03     | 0.98    |
|          |     |          |          |          |         |
| Fumarate |     |          |          |          |         |
| <5m      | 15m | -0.01    | -1.0E-03 | 3.5E-03  | 0.97    |
| <5m      | 30m | -0.01    | -8.3E-04 | 3.6E-03  | 0.99    |
| <5m      | 1h  | -0.01    | -2.0E-03 | 2.4E-03  | 0.71    |
| <5m      | 24h | -0.01    | -0.01    | -9.2E-04 | 0.01    |
| 15m      | 30m | -3.4E-03 | 2.0E-04  | 3.8E-03  | 1.00    |
| 15m      | 1h  | -4.6E-03 | -1.0E-03 | 2.6E-03  | 0.94    |
| 15m      | 24h | -0.01    | -4.3E-03 | -7.2E-04 | 0.01    |
| 30m      | 1h  | -4.8E-03 | -1.2E-03 | 2.4E-03  | 0.88    |
| 30m      | 24h | -0.01    | -4.5E-03 | -9.6E-04 | 0.01    |
| 1h       | 24h | -0.01    | -3.3E-03 | 2.4E-04  | 0.08    |
|          |     |          |          |          |         |
| Tyrosine |     |          |          |          |         |
| <5m      | 15m | -0.02    | 1.7E-03  | 0.03     | 1.00    |
| <5m      | 30m | -0.02    | 0.01     | 0.03     | 0.91    |
| <5m      | 1h  | -0.02    | 0.01     | 0.03     | 0.91    |
| <5m      | 24h | -0.03    | -4.3E-03 | 0.02     | 0.99    |
| 15m      | 30m | -0.01    | 0.01     | 0.02     | 0.93    |
| 15m      | 1h  | -0.01    | 0.01     | 0.02     | 0.93    |
| 15m      | 24h | -0.03    | -0.01    | 0.01     | 0.91    |
| 30m      | 1h  | -0.02    | 1.2E-05  | 0.02     | 1.00    |
| 30m      | 24h | -0.03    | -0.01    | 0.01     | 0.45    |

|               |     |       |          |      |      |
|---------------|-----|-------|----------|------|------|
| 1h            | 24h | -0.03 | -0.01    | 0.01 | 0.45 |
| Phenylalanine |     |       |          |      |      |
| <5m           | 15m | -0.10 | -0.01    | 0.07 | 1.00 |
| <5m           | 30m | -0.06 | 0.02     | 0.11 | 0.94 |
| <5m           | 1h  | -0.07 | 0.02     | 0.10 | 0.99 |
| <5m           | 24h | -0.11 | -0.03    | 0.06 | 0.90 |
| 15m           | 30m | -0.03 | 0.04     | 0.11 | 0.61 |
| 15m           | 1h  | -0.04 | 0.03     | 0.10 | 0.80 |
| 15m           | 24h | -0.09 | -0.02    | 0.05 | 0.97 |
| 30m           | 1h  | -0.08 | -0.01    | 0.06 | 1.00 |
| 30m           | 24h | -0.12 | -0.05    | 0.02 | 0.23 |
| 1h            | 24h | -0.11 | -0.04    | 0.03 | 0.41 |
| Histidine     |     |       |          |      |      |
| <5m           | 15m | -0.01 | -4.6E-05 | 0.01 | 1.00 |
| <5m           | 30m | -0.01 | 2.0E-03  | 0.01 | 0.99 |
| <5m           | 1h  | -0.01 | 2.6E-03  | 0.01 | 0.98 |
| <5m           | 24h | -0.01 | 4.3E-03  | 0.02 | 0.86 |
| 15m           | 30m | -0.01 | 2.0E-03  | 0.01 | 0.98 |
| 15m           | 1h  | -0.01 | 2.7E-03  | 0.01 | 0.95 |
| 15m           | 24h | -0.01 | 4.4E-03  | 0.01 | 0.74 |
| 30m           | 1h  | -0.01 | 6.8E-04  | 0.01 | 1.00 |
| 30m           | 24h | -0.01 | 2.4E-03  | 0.01 | 0.96 |
| 1h            | 24h | -0.01 | 1.7E-03  | 0.01 | 0.99 |
| Hypoxanthine  |     |       |          |      |      |
| <5m           | 15m | -0.03 | 0.02     | 0.08 | 0.74 |
| <5m           | 30m | -0.01 | 0.05     | 0.10 | 0.12 |
| <5m           | 1h  | -0.03 | 0.02     | 0.08 | 0.76 |
| <5m           | 24h | -0.03 | 0.02     | 0.07 | 0.81 |
| 15m           | 30m | -0.02 | 0.02     | 0.07 | 0.59 |
| 15m           | 1h  | -0.04 | -7.8E-04 | 0.04 | 1.00 |
| 15m           | 24h | -0.05 | -2.6E-03 | 0.04 | 1.00 |
| 30m           | 1h  | -0.07 | -0.02    | 0.02 | 0.55 |
| 30m           | 24h | -0.07 | -0.03    | 0.02 | 0.47 |
| 1h            | 24h | -0.04 | -1.8E-03 | 0.04 | 1.00 |
| Inosine       |     |       |          |      |      |

|                    |     |          |          |         |      |
|--------------------|-----|----------|----------|---------|------|
| <5m                | 15m | -0.03    | -2.8E-03 | 0.02    | 1.00 |
| <5m                | 30m | -0.04    | -0.01    | 0.01    | 0.72 |
| <5m                | 1h  | -0.03    | -0.01    | 0.02    | 0.92 |
| <5m                | 24h | -0.03    | -0.01    | 0.02    | 0.85 |
| 15m                | 30m | -0.03    | -0.01    | 0.01    | 0.78 |
| 15m                | 1h  | -0.02    | -4.5E-03 | 0.02    | 0.97 |
| 15m                | 24h | -0.03    | -0.01    | 0.01    | 0.91 |
| 30m                | 1h  | -0.02    | 3.7E-03  | 0.02    | 0.99 |
| 30m                | 24h | -0.02    | 2.1E-03  | 0.02    | 1.00 |
| 1h                 | 24h | -0.02    | -1.6E-03 | 0.02    | 1.00 |
| <b>Formate</b>     |     |          |          |         |      |
| <5m                | 15m | -0.02    | 5.0E-03  | 0.03    | 0.96 |
| <5m                | 30m | -0.01    | 0.01     | 0.03    | 0.92 |
| <5m                | 1h  | -0.02    | -1.4E-03 | 0.02    | 1.00 |
| <5m                | 24h | -0.01    | 0.01     | 0.03    | 0.63 |
| 15m                | 30m | -0.02    | 1.0E-03  | 0.02    | 1.00 |
| 15m                | 1h  | -0.02    | -0.01    | 0.01    | 0.82 |
| 15m                | 24h | -0.01    | 0.01     | 0.02    | 0.91 |
| 30m                | 1h  | -0.02    | -0.01    | 0.01    | 0.71 |
| 30m                | 24h | -0.01    | 4.0E-03  | 0.02    | 0.96 |
| 1h                 | 24h | -4.7E-03 | 0.01     | 0.03    | 0.29 |
| <b>Niacinamide</b> |     |          |          |         |      |
| <5m                | 15m | -9.9E-04 | 0.01     | 0.01    | 0.14 |
| <5m                | 30m | 1.1E-03  | 0.01     | 0.01    | 0.01 |
| <5m                | 1h  | 3.8E-04  | 0.01     | 0.01    | 0.03 |
| <5m                | 24h | -2.8E-03 | 3.6E-03  | 0.01    | 0.52 |
| 15m                | 30m | -3.2E-03 | 2.0E-03  | 0.01    | 0.82 |
| 15m                | 1h  | -3.9E-03 | 1.3E-03  | 0.01    | 0.96 |
| 15m                | 24h | -0.01    | -1.8E-03 | 3.4E-03 | 0.87 |
| 30m                | 1h  | -0.01    | -6.8E-04 | 4.5E-03 | 1.00 |
| 30m                | 24h | -0.01    | -3.8E-03 | 1.3E-03 | 0.24 |
| 1h                 | 24h | -0.01    | -3.2E-03 | 2.0E-03 | 0.44 |

<sup>a</sup>VLDL: Very low-density lipoprotein

<sup>b</sup>3-HB: 3-hydroxybutyrate

<sup>c</sup>PC: Phosphocholine

<sup>d</sup>GPC: Glycerophosphocholine
